# Supplementary material for: An auxin–tyrosine derivative based biocompatible supergelator: a template for fabrication of nanoparticles for sustained release of model drugs
Source: Royal Society of Chemistry journal article supplement (doi:10.1039/c7nj04390b), 2018-01-01
Supplement: c7nj04390b1.pdf [file c7nj04390b1.pdf]

## Supporting Information

### ***Auxin–Tyrosine derivative based biocompatible supergelator : A Template for fabrication of nanoparticles for sustained release of model drugs***

Priyanka Tiwari,<sup>a</sup> Anindya Basu,<sup>b</sup> Sonu Sahu,<sup>b</sup> Sadhna Gound,<sup>b</sup> Ryann M. Christman,<sup>c</sup> Amit K. Tiwari,<sup>c</sup> PiyushTrivedi<sup>b</sup> and Anita DuttKonar,<sup>a,b\*</sup>

#### Table of Contents

---

| Category                                          | Page No. |
|---------------------------------------------------|----------|
| <hr/>                                             |          |
| 1. FTIR Spectra of Hydrogelator-II (Xerogel)      | 2        |
| 2. FTIR Spectra of Hydrogelator- II (solid)       | 2        |
| 3. FTIR Spectra of Hydrogelator- III (solid)      | 3        |
| 4. Mass Spectra of Hydrogelator- II               | 3        |
| 5. Mass Spectra of Hydrogelator- III              | 3        |
| 6. <sup>1</sup> H NMR Spectra of Hydrogelator-II  | 4        |
| 7. <sup>1</sup> H NMR Spectra of Hydrogelator-III | 4        |
| 8. Table S1:Dihedral angle Table                  | 5        |

---

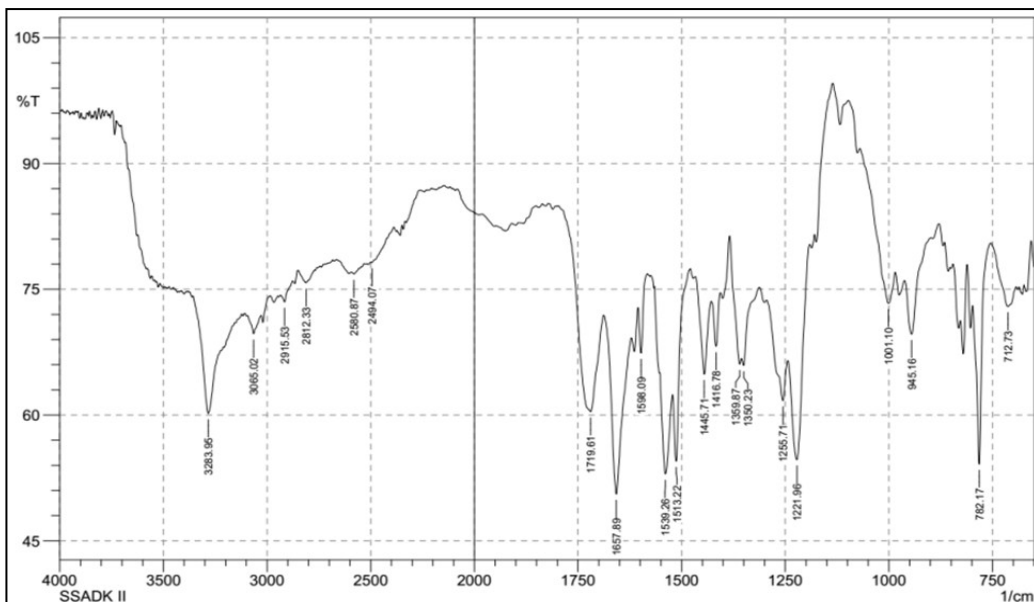

Figure S1. FT-IR Spectra of Hydrogelator- II (Xerogel)

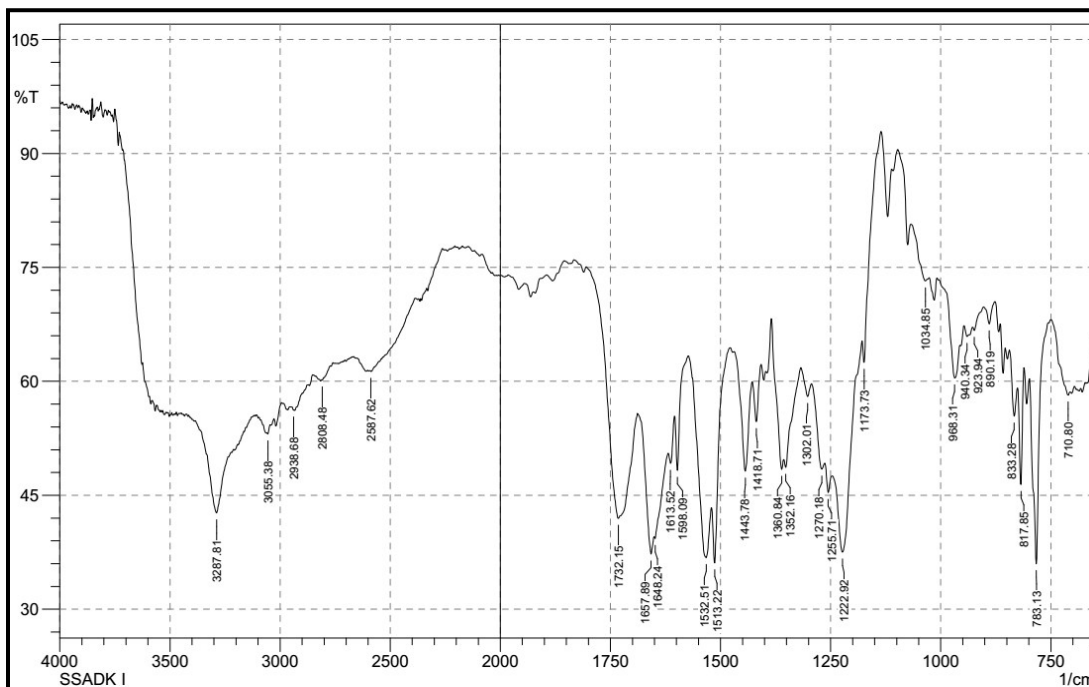

Figure S2. FT-IR Spectra of Hydrogelator- II (Solid)

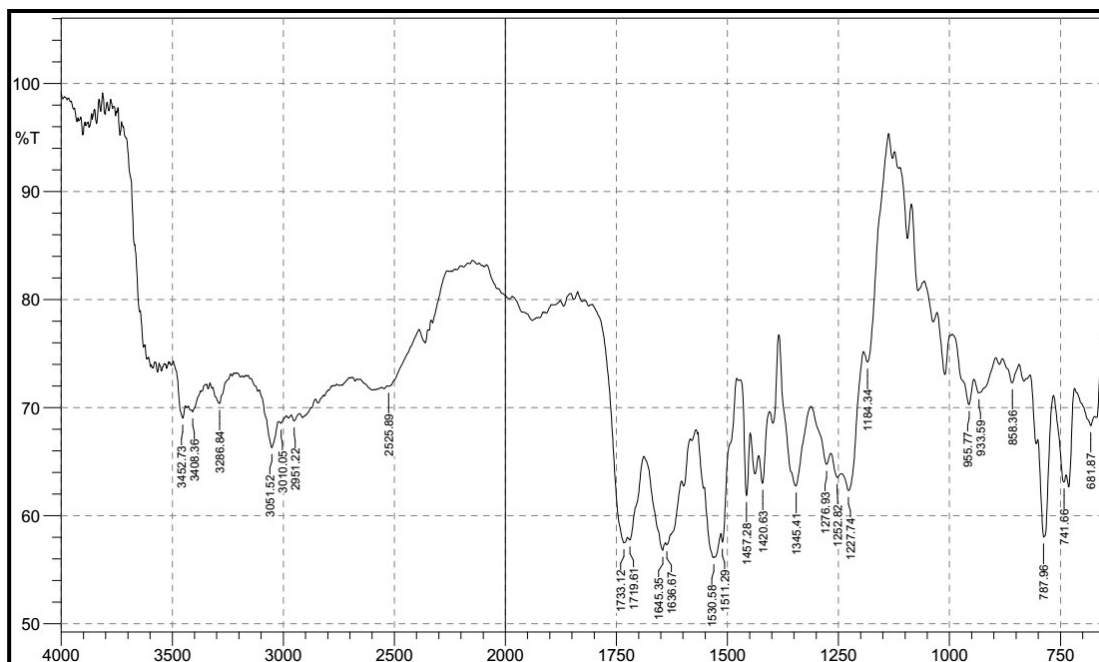

**Figure S3. FT-IR Spectra of Hydrogelator- III (Solid)**

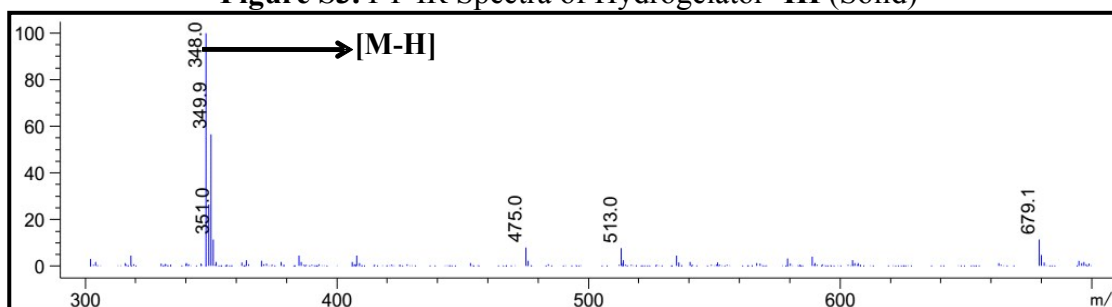

**Figure S4. Mass Spectra of Hydrogelator- II**

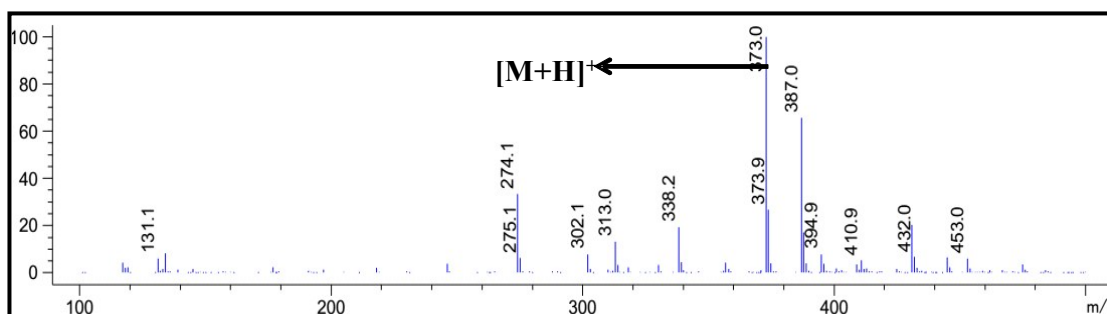

**Figure S5. Mass Spectra of Hydrogelator- III**

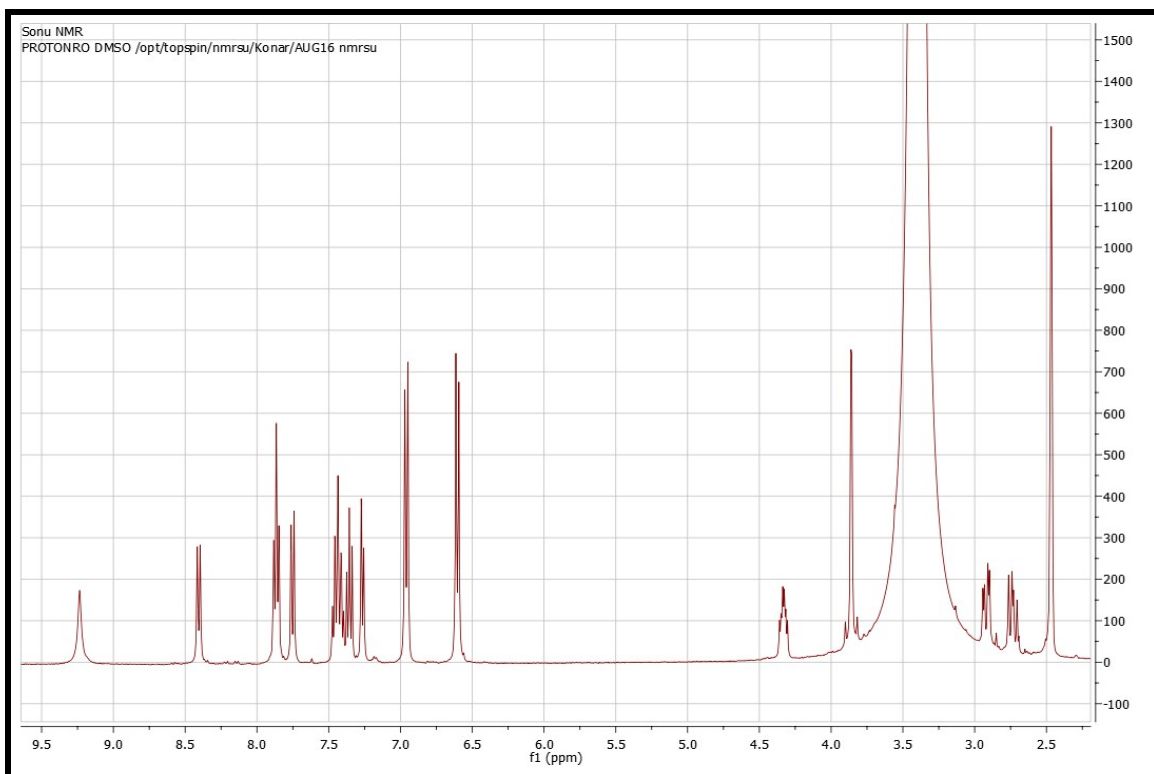

**Figure S6.** <sup>1</sup>H NMR Spectra of Hydrogelator- II

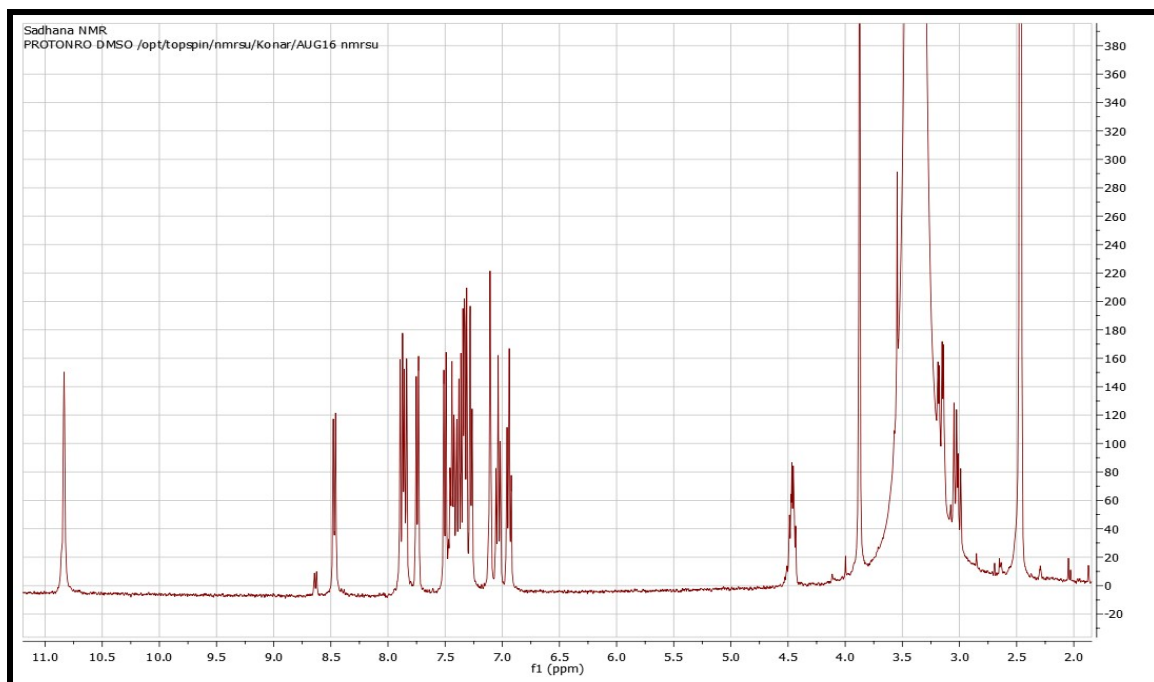

**Figure S7.** <sup>1</sup>H NMR Spectra of Hydrogelator- III

Table S1: Dihedral angle for the conformers used for computational studies

| Peptide Bond angles |          |          | Indole Dihedral |
|---------------------|----------|----------|-----------------|
| I                   | II       | III      | III             |
| 177.686             | 164.649  | -176.591 | -1.295          |
| 179.267             | 177.771  | -173.146 | 2.064           |
| -179.944            | -178.989 | 169.447  | -3.514          |
| 179.119             | 169.645  | -174.983 | -5.25           |
